# Supplementary material for: The annexin A1/FPR2 signaling axis expands alveolar macrophages, limits viral replication, and attenuates pathogenesis in the murine influenza A virus infection model
Source: PubMed Central journal article supplement (PMC6902725; doi:10.1096/fj.201901265r), 2019-10-02
Supplement: fj.201901265R.sf1.pdf [file fj.201901265R.sf1.pdf]

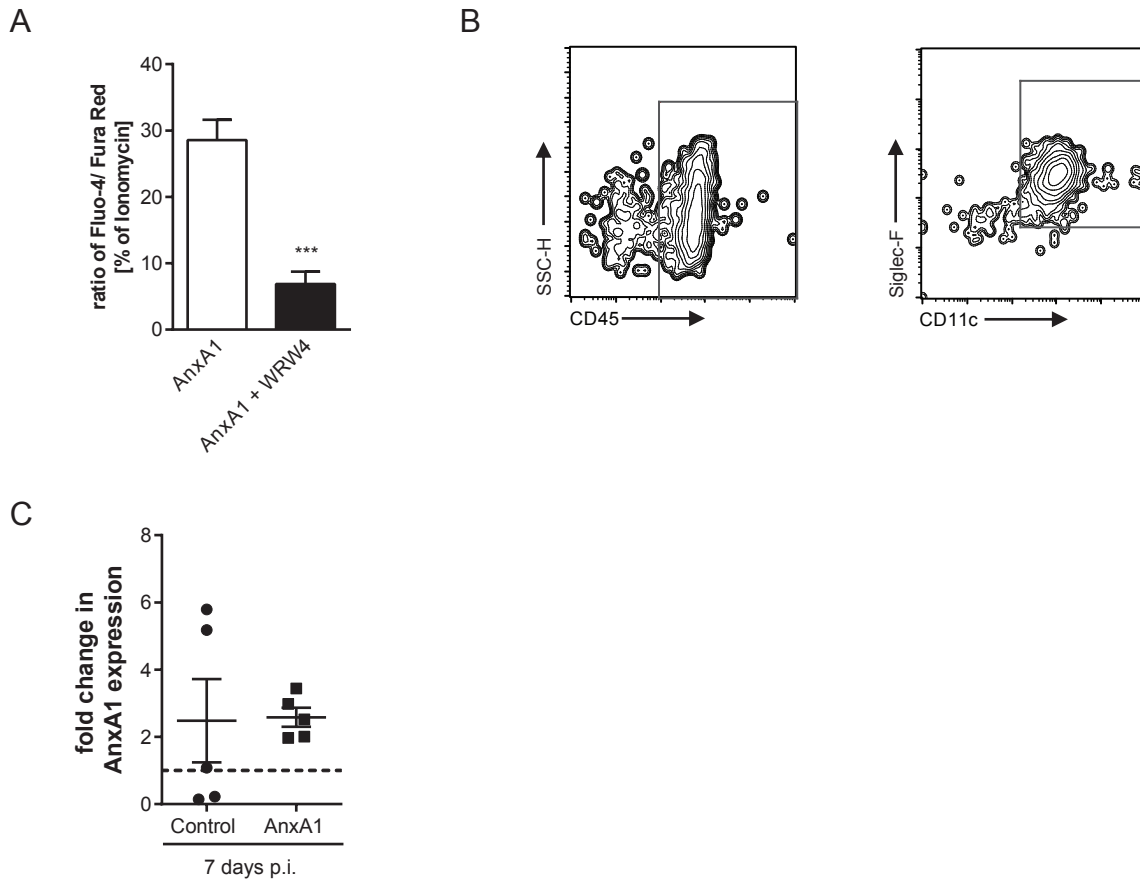

**Suppl. Fig. 1. Flow cytometry gating strategy for analysis of BAL immune cell populations.** (A) Ratiometric analysis of AnxA1-induced increase in cytosolic  $Ca^{2+}$ . (B) BAL cells were gated for size and granularity by forward and side scatter (FSC and SSC), followed by a pre-gating on  $CD45^+$  events. Cells in BAL fluids of IAV-infected mice obtained at indicated time points of treatment were pre-gated on  $CD45^+$  events and were analyzed for the levels of AMs ( $CD11c^+Siglec-F^+MHCII^{+/-}$ ). (C) qPCR analysis of AnxA1 mRNA levels in lung homogenates of AnxA1 or control-treated mice at day 7 p.i.
